# Supplementary material for: Gender-Disaggregated Consumer Testing and Descriptive Sensory Analysis of Local and New Yam Varieties
Source: MDPI journal article supplement (doi:10.3390/foods12030537), 2023-01-25
Supplement: s1 [file s1]

## Supplementary Materials

**Table S1.** Kruskal Wallis test statistics of the effect of age group liking of *D. rotundata* boiled yam.

|                       | Age Groupings | Ranks |           | Kruskal Wallis Test Statistics |    |         |
|-----------------------|---------------|-------|-----------|--------------------------------|----|---------|
|                       |               | N     | Mean Rank | Chi-Square                     | Df | P-Value |
| Colour                | < 30 years    | 323   | 604.43    | 1.548                          | 2  | 0.461   |
|                       | 30-65 years   | 817   | 595.54    |                                |    |         |
|                       | > 65 years    | 60    | 646.92    |                                |    |         |
| Hardness              | < 30 years    | 323   | 611.45    | 0.501                          | 2  | 0.778   |
|                       | 30-65 years   | 817   | 596.31    |                                |    |         |
|                       | > 65 years    | 60    | 598.55    |                                |    |         |
| Mealiness             | < 30 years    | 323   | 605.08    | 0.400                          | 2  | 0.819   |
|                       | 30-65 years   | 817   | 597.12    |                                |    |         |
|                       | > 65 years    | 60    | 621.86    |                                |    |         |
| Chewiness             | < 30 years    | 323   | 614.53    | 3.608                          | 2  | 0.165   |
|                       | 30-65 years   | 817   | 600.24    |                                |    |         |
|                       | > 65 years    | 60    | 528.44    |                                |    |         |
| Aroma                 | < 30 years    | 323   | 611.88    | 0.543                          | 2  | 0.762   |
|                       | 30-65 years   | 817   | 596.29    |                                |    |         |
|                       | > 65 years    | 60    | 596.57    |                                |    |         |
| Taste                 | < 30 years    | 323   | 585.83    | 1.068                          | 2  | 0.586   |
|                       | 30-65 years   | 817   | 607.07    |                                |    |         |
|                       | > 65 years    | 60    | 590.04    |                                |    |         |
| Overall acceptability | < 30 years    | 323   | 620.45    | 2.877                          | 2  | 0.237   |
|                       | 30-65 years   | 817   | 596.54    |                                |    |         |
|                       | > 65 years    | 60    | 547.08    |                                |    |         |

**Table S2.** Kruskal Wallis test statistics of the effect of age group and liking of *D. rotundata* pounded yam.

|                | Age Groupings | Ranks |           | Kruskal Wallis Test Statistics |    |         |
|----------------|---------------|-------|-----------|--------------------------------|----|---------|
|                |               | N     | Mean Rank | Chi-Square                     | Df | P-Value |
| Aroma          | < 30 years    | 325   | 590.73    | 1.740                          | 2  | 0.419   |
|                | 30-65 years   | 815   | 600.63    |                                |    |         |
|                | > 65 years    | 60    | 651.71    |                                |    |         |
|                | Total         | 1200  |           |                                |    |         |
| Colour         | < 30 years    | 325   | 622.16    | 2.215                          | 2  | 0.330   |
|                | 30-65 years   | 815   | 593.84    |                                |    |         |
|                | > 65 years    | 60    | 573.67    |                                |    |         |
|                | Total         | 1200  |           |                                |    |         |
| Mouldability   | < 30 years    | 325   | 613.15    | 1.175                          | 2  | 0.556   |
|                | 30-65 years   | 815   | 593.71    |                                |    |         |
|                | > 65 years    | 60    | 624.13    |                                |    |         |
|                | Total         | 1200  |           |                                |    |         |
| Stretchability | < 30 years    | 325   | 590.79    | 0.395                          | 2  | 0.821   |
|                | 30-65 years   | 815   | 603.77    |                                |    |         |
|                | > 65 years    | 60    | 608.71    |                                |    |         |
|                | Total         | 1200  |           |                                |    |         |
| Hardness       | < 30 years    | 325   | 619.59    | 1.746                          | 2  | 0.418   |
|                | 30-65 years   | 815   | 591.85    |                                |    |         |

|                              |             |      |        |       |   |       |
|------------------------------|-------------|------|--------|-------|---|-------|
| <b>Lumpiness</b>             | > 65 years  | 60   | 614.62 | 1.038 | 2 | 0.595 |
|                              | Total       | 1200 |        |       |   |       |
|                              | < 30 years  | 325  | 602.37 |       |   |       |
|                              | 30-65 years | 815  | 596.75 |       |   |       |
|                              | > 65 years  | 60   | 641.37 |       |   |       |
| <b>Overall acceptability</b> | Total       | 1200 |        | 0.550 | 2 | 0.760 |
|                              | < 30 years  | 325  | 612.22 |       |   |       |
|                              | 30-65 years | 815  | 596.37 |       |   |       |
|                              | > 65 years  | 60   | 593.06 |       |   |       |
|                              | Total       | 1200 |        |       |   |       |

**Table S3.** Kruskal Wallis test statistics of the effects of age group and liking of *D. alata* boiled yam.

|                       |             | Ranks |           | Test Statistics |    |         |
|-----------------------|-------------|-------|-----------|-----------------|----|---------|
| Age category          |             | N     | Mean Rank | Chi-Square      | Df | P-Value |
| Colour                | < 30 years  | 343   | 694.97    | 2.831           | 2  | 0.243   |
|                       | 30-65 years | 1037  | 725.82    |                 |    |         |
|                       | > 65 years  | 60    | 774.45    |                 |    |         |
|                       | Total       | 1440  |           |                 |    |         |
| Hardness              | < 30 years  | 343   | 719.54    | 0.778           | 2  | 0.678   |
|                       | 30-65 years | 1037  | 723.33    |                 |    |         |
|                       | > 65 years  | 60    | 677.07    |                 |    |         |
|                       | Total       | 1440  |           |                 |    |         |
| Mealiness             | < 30 years  | 343   | 699.00    | 1.977           | 2  | 0.372   |
|                       | 30-65 years | 1037  | 724.93    |                 |    |         |
|                       | > 65 years  | 60    | 766.93    |                 |    |         |
|                       | Total       | 1440  |           |                 |    |         |
| Chewiness             | < 30 years  | 343   | 690.44    | 3.700           | 2  | 0.157   |
|                       | 30-65 years | 1037  | 727.06    |                 |    |         |
|                       | > 65 years  | 60    | 778.93    |                 |    |         |
|                       | Total       | 1440  |           |                 |    |         |
| Aroma                 | < 30 years  | 343   | 679.37    | 5.872           | 2  | 0.053   |
|                       | 30-65 years | 1037  | 730.69    |                 |    |         |
|                       | > 65 years  | 60    | 779.43    |                 |    |         |
|                       | Total       | 1440  |           |                 |    |         |
| Taste                 | < 30 years  | 343   | 711.97    | 1.001           | 2  | 0.606   |
|                       | 30-65 years | 1037  | 720.66    |                 |    |         |
|                       | > 65 years  | 60    | 766.43    |                 |    |         |
|                       | Total       | 1440  |           |                 |    |         |
| Overall acceptability | < 30 years  | 343   | 720.77    | 0.023           | 2  | 0.988   |
|                       | 30-65 years | 1037  | 719.98    |                 |    |         |
|                       | > 65 years  | 60    | 728.00    |                 |    |         |
|                       | Total       | 1440  |           |                 |    |         |

**Table S4.** Kruskal Wallis test statistics of the effect of age group and liking of *D. alata* pounded yam.

| Descriptors | Age         | Ranks |           | Test Statistics |    |         |
|-------------|-------------|-------|-----------|-----------------|----|---------|
|             |             | N     | Mean Rank | Chi-Square      | Df | P-Value |
| Aroma       | < 30 years  | 310   | 723.09    | 0.020           | 2  | 0.990   |
|             | 30-65 years | 1010  | 719.67    |                 |    |         |
|             | > 65 years  | 120   | 720.78    |                 |    |         |
|             | Total       | 1440  |           |                 |    |         |

|                       |             |      |        |       |   |       |
|-----------------------|-------------|------|--------|-------|---|-------|
| Colour                | < 30 years  | 310  | 737.81 | 1.409 | 2 | 0.494 |
|                       | 30-65 years | 1010 | 712.99 |       |   |       |
|                       | > 65 years  | 120  | 739.01 |       |   |       |
|                       | Total       | 1440 |        |       |   |       |
| Stretchability        | < 30 years  | 310  | 705.51 | 0.726 | 2 | 0.695 |
|                       | 30-65 years | 1010 | 726.21 |       |   |       |
|                       | > 65 years  | 120  | 711.18 |       |   |       |
|                       | Total       | 1440 |        |       |   |       |
| Hardness              | < 30 years  | 310  | 695.57 | 1.968 | 2 | 0.374 |
|                       | 30-65 years | 1010 | 729.80 |       |   |       |
|                       | > 65 years  | 120  | 706.64 |       |   |       |
|                       | Total       | 1440 |        |       |   |       |
| Lumpy                 | < 30 years  | 310  | 735.94 | 4.745 | 2 | 0.093 |
|                       | 30-65 years | 1010 | 709.85 |       |   |       |
|                       | > 65 years  | 120  | 770.22 |       |   |       |
|                       | Total       | 1440 |        |       |   |       |
| Overall acceptability | < 30 years  | 310  | 724.52 | 0.571 | 2 | 0.752 |
|                       | 30-65 years | 1010 | 722.32 |       |   |       |
|                       | > 65 years  | 120  | 694.77 |       |   |       |
|                       | Total       | 1440 |        |       |   |       |

**Table S5.** Descriptive statistics of sex differences in attribute preference for boiled yam.

| Boiled Yam            |        |             |      |           |              |       |                 |
|-----------------------|--------|-------------|------|-----------|--------------|-------|-----------------|
| Descriptors           | Sex    | Descriptive |      |           | F-Statistics |       | Significance    |
|                       |        | N           | Mean | Std. Dev. | F            | Sig.  |                 |
| Colour                | Male   | 704         | 2.60 | 2.403     | 0.141        | 0.708 | No Significance |
|                       | Female | 736         | 2.55 | 2.435     |              |       |                 |
|                       | Total  | 1440        | 2.58 | 2.419     |              |       |                 |
| Hardness              | Male   | 704         | 2.53 | 2.165     | 0.67         | 0.413 | No Significance |
|                       | Female | 736         | 2.63 | 2.356     |              |       |                 |
|                       | Total  | 1440        | 2.58 | 2.264     |              |       |                 |
| Mealiness             | Male   | 704         | 2.31 | 1.846     | 0.841        | 0.359 | No Significance |
|                       | Female | 736         | 2.4  | 1.979     |              |       |                 |
|                       | Total  | 1440        | 2.36 | 1.915     |              |       |                 |
| Chewiness             | Male   | 704         | 2.24 | 1.881     | 0.686        | 0.408 | No Significance |
|                       | Female | 736         | 2.32 | 2.061     |              |       |                 |
|                       | Total  | 1440        | 2.28 | 1.975     |              |       |                 |
| Aroma                 | Male   | 704         | 2.61 | 2.398     | 0.972        | 0.324 | No Significance |
|                       | Female | 736         | 2.49 | 2.336     |              |       |                 |
|                       | Total  | 1440        | 2.55 | 2.366     |              |       |                 |
| Taste                 | Male   | 704         | 2.29 | 1.978     | 0.42         | 0.517 | No Significance |
|                       | Female | 736         | 2.36 | 2.121     |              |       |                 |
|                       | Total  | 1440        | 2.33 | 2.052     |              |       |                 |
| Overall Acceptability | Male   | 704         | 2.48 | 1.925     | 0.041        | 0.839 | No Significance |
|                       | Female | 736         | 2.46 | 1.978     |              |       |                 |
|                       | Total  | 1440        | 2.47 | 1.952     |              |       |                 |

**Table S6.** Descriptive statistics of sex differences in attribute preference for boiled yam.

| Dependent variables   | Gender | Pounded Yam |      |           | F-Statistics |       | Significance    |
|-----------------------|--------|-------------|------|-----------|--------------|-------|-----------------|
|                       |        | N           | Mean | Std. Dev. | F            | Sig.  |                 |
| Smell                 | Male   | 702         | 2.21 | 2.098     | 0.248        | 0.618 | No Significance |
|                       | Female | 738         | 2.16 | 1.987     |              |       |                 |
|                       | Total  | 1440        | 2.18 | 2.042     |              |       |                 |
| Colour                | Male   | 702         | 2.02 | 1.873     | 0.71         | 0.399 | No Significance |
|                       | Female | 738         | 2.11 | 2.043     |              |       |                 |
|                       | Total  | 1440        | 2.06 | 1.962     |              |       |                 |
| String_Elastic        | Male   | 702         | 2.4  | 1.918     | 0.296        | 0.587 | No Significance |
|                       | Female | 738         | 2.35 | 1.816     |              |       |                 |
|                       | Total  | 1440        | 2.38 | 1.866     |              |       |                 |
| Hard_Soft             | Male   | 702         | 2.29 | 1.875     | 0.194        | 0.66  | No Significance |
|                       | Female | 738         | 2.25 | 1.697     |              |       |                 |
|                       | Total  | 1440        | 2.27 | 1.786     |              |       |                 |
| Sticky                | Male   | 702         | 2.04 | 1.662     | 1.346        | 0.246 | No Significance |
|                       | Female | 738         | 1.94 | 1.405     |              |       |                 |
|                       | Total  | 1440        | 1.99 | 1.536     |              |       |                 |
| Lumpy                 | Male   | 702         | 1.65 | 1.539     | 2.439        | 0.119 | No Significance |
|                       | Female | 738         | 1.54 | 1.231     |              |       |                 |
|                       | Total  | 1440        | 1.59 | 1.39      |              |       |                 |
| Overall Acceptability | Male   | 702         | 2.37 | 1.897     | 0.017        | 0.897 | No Significance |
|                       | Female | 738         | 2.39 | 1.873     |              |       |                 |
|                       | Total  | 1440        | 2.38 | 1.884     |              |       |                 |

**Table S7.** Mann-Whitney U & Wilcoxon test of communities and their descriptors of boiled *D. alata* yam varieties.

| Descriptor | Communities       | Ranks |           | Mann-Whitney U & Wilcoxon Test |            |        |         |  |
|------------|-------------------|-------|-----------|--------------------------------|------------|--------|---------|--|
|            |                   | N     | Mean Rank | Mann-Whitney U                 | Wilcoxon W | Z      | P-Value |  |
| Colour     | Other communities | 720   | 738.93    | 245929                         | 505489     | -1.800 | 0.072   |  |
|            | District capital  | 720   | 702.07    |                                |            |        |         |  |
|            | Total             | 1440  |           |                                |            |        |         |  |
| Hardness   | Other communities | 720   | 760.58    | 230342                         | 489902     | -3.844 | 0.000   |  |
|            | District capital  | 720   | 680.42    |                                |            |        |         |  |
|            | Total             | 1440  |           |                                |            |        |         |  |
| Mealiness  | Other communities | 720   | 717.25    | 256858                         | 516418     | -.313  | 0.755   |  |
|            | District capital  | 720   | 723.75    |                                |            |        |         |  |
|            | Total             | 1440  |           |                                |            |        |         |  |
| Chewiness  | Other communities | 720   | 724.50    | 256318                         | 515878     | -.391  | 0.696   |  |
|            | District capital  | 720   | 716.50    |                                |            |        |         |  |
|            | Total             | 1440  |           |                                |            |        |         |  |
| Aroma      | Other communities | 720   | 750.54    | 237574                         | 497134     | -2.917 | 0.004   |  |
|            | District capital  | 720   | 690.46    |                                |            |        |         |  |
|            | Total             | 1440  |           |                                |            |        |         |  |
| Taste      | Other communities | 720   | 712.60    | 253509                         | 513069     | -.771  | 0.441   |  |
|            | District capital  | 720   | 728.40    |                                |            |        |         |  |
|            | Total             | 1440  |           |                                |            |        |         |  |

|                       |                   |      |        |        |        |       |       |
|-----------------------|-------------------|------|--------|--------|--------|-------|-------|
| Overall Acceptability | Other communities | 720  | 728.44 | 253481 | 513041 | -.757 | 0.449 |
|                       | District capital  | 720  | 712.56 |        |        |       |       |
|                       | Total             | 1440 |        |        |        |       |       |

**Table S8.** Mann-Whitney U & wilcoxon test of communities and their descriptors of pounded *D. alata* varieties.

| Descriptor            | Communities       | Ranks |           | Mann-Whitney U & Wilcoxon Test |            |        |         |
|-----------------------|-------------------|-------|-----------|--------------------------------|------------|--------|---------|
|                       |                   | N     | Mean Rank | Mann-Whitney U                 | Wilcoxon W | Z      | P-Value |
| Aroma                 | Other communities | 720   | 776.46    | 218910                         | 478470     | -5.642 | .000    |
|                       | District capital  | 720   | 664.54    |                                |            |        |         |
|                       | Total             | 1440  |           |                                |            |        |         |
| Colour                | Other communities | 720   | 757.11    | 232839                         | 492399     | -3.773 | .000    |
|                       | District capital  | 720   | 683.89    |                                |            |        |         |
|                       | Total             | 1440  |           |                                |            |        |         |
| Stretchability        | Other communities | 720   | 748.70    | 238898                         | 498458     | -2.714 | .007    |
|                       | District capital  | 720   | 692.30    |                                |            |        |         |
|                       | Total             | 1440  |           |                                |            |        |         |
| Hard/Soft             | Other communities | 720   | 724.92    | 256017                         | 515577     | -.427  | .669    |
|                       | District capital  | 720   | 716.08    |                                |            |        |         |
|                       | Total             | 1440  |           |                                |            |        |         |
| Lumpy                 | Other communities | 720   | 747.84    | 239519                         | 499079     | -3.244 | .001    |
|                       | District capital  | 720   | 693.16    |                                |            |        |         |
|                       | Total             | 1440  |           |                                |            |        |         |
| Overall Acceptability | Other communities | 720   | 739.81    | 245295                         | 504855     | -1.868 | .062    |
|                       | District capital  | 720   | 701.19    |                                |            |        |         |
|                       | Total             | 1440  |           |                                |            |        |         |

**Table S9.** Mann-Whitney test of the effects of district capitals and other communities on the level of liking for pounded *D. rotundata* varieties.

|               |                   | N    | Mean Rank | Mann-Whitney U | Wilcoxon W | Z      | P-Value |
|---------------|-------------------|------|-----------|----------------|------------|--------|---------|
| Aroma         | District capital  | 600  | 596.70    | 177717.50      | 358017.50  | -0.401 | 0.689   |
|               | Other communities | 600  | 604.30    |                |            |        |         |
|               | Total             | 1200 |           |                |            |        |         |
| Colour        | District capital  | 600  | 593.93    | 176058.50      | 356358.50  | -0.704 | 0.482   |
|               | Other communities | 600  | 607.07    |                |            |        |         |
|               | Total             | 1200 |           |                |            |        |         |
| Mouldability  | District capital  | 600  | 622.75    | 166649.00      | 346949.00  | -2.382 | 0.017   |
|               | Other communities | 600  | 578.25    |                |            |        |         |
|               | Total             | 1200 |           |                |            |        |         |
| Strechability | District capital  | 600  | 619.30    | 168720.00      | 349020.00  | -1.966 | 0.049   |
|               | Other communities | 600  | 581.70    |                |            |        |         |
|               | Total             | 1200 |           |                |            |        |         |
| Hardness      | District capital  | 600  | 604.02    | 177888.50      | 358188.50  | -0.368 | 0.713   |

|                       |                   |      |        |           |           |        |       |
|-----------------------|-------------------|------|--------|-----------|-----------|--------|-------|
| Lumpiness             | Other communities | 600  | 596.98 |           |           |        |       |
|                       | Total             | 1200 |        |           |           |        |       |
|                       | District capital  | 600  | 619.70 | 168479.00 | 348779.00 | -2.017 | 0.044 |
|                       | Other communities | 600  | 581.30 |           |           |        |       |
|                       | Total             | 1200 |        |           |           |        |       |
|                       | District capital  | 600  | 611.25 | 173552.50 | 353852.50 | -1.110 | 0.267 |
| Overall Acceptability | Other communities | 600  | 589.75 |           |           |        |       |
|                       | Total             | 1200 |        |           |           |        |       |

**Table S10.** Mann-Whitney test of the effects of district capitals and other communities on the level of liking for boiled *D. rotundata* varieties.

|                       | Communities       | N    | Mean Rank | Mann-Whitney U | Wilcoxon W | Z      | P-value |
|-----------------------|-------------------|------|-----------|----------------|------------|--------|---------|
| Colour                | District capital  | 600  | 568.37    | 139280.5       | 264530.5   | -2.239 | 0.025   |
|                       | Other communities | 600  | 529.06    |                |            |        |         |
|                       | Total             | 1200 |           |                |            |        |         |
| Hardness              | District capital  | 600  | 559.35    | 144691.5       | 269941.5   | -1.076 | 0.282   |
|                       | Other communities | 600  | 539.88    |                |            |        |         |
|                       | Total             | 1200 |           |                |            |        |         |
| Mealiness             | District capital  | 600  | 538.98    | 143085.5       | 323385.5   | -1.386 | 0.166   |
|                       | Other communities | 600  | 564.33    |                |            |        |         |
|                       | Total             | 1200 |           |                |            |        |         |
| Chewiness             | District capital  | 600  | 563.44    | 142236.5       | 267486.5   | -1.59  | 0.112   |
|                       | Other communities | 600  | 534.97    |                |            |        |         |
|                       | Total             | 1200 |           |                |            |        |         |
| Aroma                 | District capital  | 600  | 563.23    | 142363         | 267613     | -1.554 | 0.12    |
|                       | Other communities | 600  | 535.23    |                |            |        |         |
|                       | Total             | 1200 |           |                |            |        |         |
| Taste                 | District capital  | 600  | 567.14    | 140013.5       | 265263.5   | -2.038 | 0.042   |
|                       | Other communities | 600  | 530.53    |                |            |        |         |
|                       | Total             | 1100 |           |                |            |        |         |
| Overall Acceptability | District capital  | 600  | 556.84    | 146196.5       | 271446.5   | -0.762 | 0.446   |
|                       | Other communities | 600  | 542.89    |                |            |        |         |
|                       | Total             | 1100 |           |                |            |        |         |
